# Supplementary material for: H2S Emission and Microbial Community of Chicken Manure and Vegetable Waste in Anaerobic Digestion: A Comparative Study
Source: MDPI journal article supplement (doi:10.3390/fermentation9020169), 2023-02-13
Supplement: s1 [file s1]

Archive with 1 entries (1 files):
- fermentation-2173791-supplementary.pdf
