# Supplementary material for: H2S Emission and Microbial Community of Chicken Manure and Vegetable Waste in Anaerobic Digestion: A Comparative Study
Source: MDPI journal article supplement (doi:10.3390/fermentation9020169), 2023-02-13
Supplement: s1 [file s1 › fermentation-2173791-supplementary.pdf]

# H<sub>2</sub>S Emission and Microbial Community of Chicken Manure and Vegetable Waste in Anaerobic Digestion: A Comparative Study

Guangliang Tian <sup>1,2,\*</sup>, Marvin Yeung <sup>2</sup> and Jinying Xi <sup>2,3,\*</sup>

<sup>1</sup> Key Laboratory of Plant Resource Conservation and Germplasm Innovation in Mountainous Region (Ministry of Education), Institute of New Rural Development, Guizhou University, Guiyang 550025, China

<sup>2</sup> Environmental Simulation and Pollution Control State Key Joint Laboratory, School of Environment, Tsinghua University, Beijing 100084, China

<sup>3</sup> State Environmental Protection Key Laboratory of Microorganism Application and Risk Control (SMARC), Graduate School at Shenzhen, Tsinghua University

\* Correspondence: gltian@gzu.edu.cn (G.T.); xijinying@tsinghua.edu.cn (J.X.); Tel.: +86-173-8414-8265 (G.T.); +86-10-62792778 (J.X.)

## File S1: Calculation process of the equilibrium from sulfide to H<sub>2</sub>S in the liquid phase

According to the law of dissolution equilibrium,  $K_{S1}$  and  $K_{S2}$  can be defined as follows,

$$H_2S \rightleftharpoons HS^- + H^+ \Rightarrow K_{S1} = \frac{[HS^-][H^+]}{[H_2S]}$$

$$S^{2-} \rightleftharpoons HS^- + H^+ \Rightarrow K_{S2} = \frac{[S^{2-}][H^+]}{[HS^-]}$$

where  $[HS^-]$ ,  $[H^+]$ , and  $[H_2S]$  represent the molar concentrations of  $HS^-$ ,  $H^+$ , and  $H_2S$ . The soluble sulfide molar concentration was defined as  $[S_T]$ :

$$[S^{2-}] + [HS^-] + [H_2S] = [S_T]$$

According to the charge balance equation:

$$[H^+] = [HO^-] + [HS^-] + 2[S^{2-}]$$

$$pH = -\lg[H^+] \Rightarrow [H^+] = 10^{-pH}$$

$$pH = -\lg \frac{10^{-14}}{[HO^-]} \Rightarrow [HO^-] = \frac{10^{-14}}{10^{-pH}} \approx 0$$

(the pH value is between 5.8 and 7.3 in this study, thus,  $[HO^-]$  was very low and close to zero)

$$[HS^-] + 2[S^{2-}] = 10^{-pH}$$

$$[S^{2-}] + [HS^-] + [H_2S] = [S_T]$$

$$\frac{K_{S1}}{10^{-pH}} = \frac{[HS^-]}{[H_2S]}$$

$$\frac{K_{S1}K_{S2}}{(10^{-pH})^2} = \frac{[HS^-][S^{2-}]}{[HS^-][H_2S]} = \frac{[S^{2-}]}{[H_2S]}$$

$$1 + \frac{K_{S1}}{10^{-pH}} + \frac{K_{S1}K_{S2}}{10^{-2pH}} = \frac{[H_2S] + [HS^-] + [S^{2-}]}{[H_2S]} = \frac{[S_T]}{[H_2S]}$$

$$[H_2S] = \frac{[S_T]}{1 + \frac{K_{S1}}{10^{-pH}} + \frac{K_{S1}K_{S2}}{10^{-2pH}}}$$
